# Supplementary material for: Mapping Online Geographical Indication: Agri-Food Markets on E-Retail Shelves
Source: MDPI journal article supplement (doi:10.3390/agronomy11122385), 2021-11-24
Supplement: s1 [file s1]

## Specifications table

|                                       |                                                                                                                                                                                                                                                                                                                                                                                                                                                                                                                                                                                                                                                                                                                                                                                                                                                                                                                                                                                                                                                                                                                                                                                                                                                                                                                                                                                                                                                          |
|---------------------------------------|----------------------------------------------------------------------------------------------------------------------------------------------------------------------------------------------------------------------------------------------------------------------------------------------------------------------------------------------------------------------------------------------------------------------------------------------------------------------------------------------------------------------------------------------------------------------------------------------------------------------------------------------------------------------------------------------------------------------------------------------------------------------------------------------------------------------------------------------------------------------------------------------------------------------------------------------------------------------------------------------------------------------------------------------------------------------------------------------------------------------------------------------------------------------------------------------------------------------------------------------------------------------------------------------------------------------------------------------------------------------------------------------------------------------------------------------------------|
| <b>Subject</b>                        | <i>Social Sciences</i>                                                                                                                                                                                                                                                                                                                                                                                                                                                                                                                                                                                                                                                                                                                                                                                                                                                                                                                                                                                                                                                                                                                                                                                                                                                                                                                                                                                                                                   |
| <b>Specific subject area</b>          | <i>Survey of Geographical Indication agri-food products in e-retail supermarkets</i>                                                                                                                                                                                                                                                                                                                                                                                                                                                                                                                                                                                                                                                                                                                                                                                                                                                                                                                                                                                                                                                                                                                                                                                                                                                                                                                                                                     |
| <b>Type of data</b>                   | Table                                                                                                                                                                                                                                                                                                                                                                                                                                                                                                                                                                                                                                                                                                                                                                                                                                                                                                                                                                                                                                                                                                                                                                                                                                                                                                                                                                                                                                                    |
| <b>How the data were acquired</b>     | <i>The survey was done on the website of 28 supermarkets towards finding all geographical indication agri-food products displayed and classified by their register and category.</i>                                                                                                                                                                                                                                                                                                                                                                                                                                                                                                                                                                                                                                                                                                                                                                                                                                                                                                                                                                                                                                                                                                                                                                                                                                                                     |
| <b>Data format</b>                    | Raw<br>Analyzed<br>Filtered                                                                                                                                                                                                                                                                                                                                                                                                                                                                                                                                                                                                                                                                                                                                                                                                                                                                                                                                                                                                                                                                                                                                                                                                                                                                                                                                                                                                                              |
| <b>Description of data collection</b> | <p><i>The survey collected data from 4 supermarkets of 11 countries, seven from the EU and four from Mercosur. The data collection considered all GI registered products in either of the systems in force of the regions involved. All products were classified according to their registration and category. In addition, Mercosur's products were classified according to the EU's categorization of products to be standard and comparable.</i></p> <p><i>All data were separated by country.</i></p> <p><i>The data collection also counted the number of brands and if there were supermarket brands displayed.</i></p> <p><i>Only agri-food products were considered. Wines, aromatized wines and spirits were not considered.</i></p> <p><i>If the website required a delivery address, the city center of the country's most populated city was used.</i></p>                                                                                                                                                                                                                                                                                                                                                                                                                                                                                                                                                                                   |
| <b>Data source location</b>           | <p><i>Data was collected from the following websites: Provide the information requested below. If any of the bullet points do not apply, please delete them:</i></p> <p><i>France:</i></p> <ul style="list-style-type: none"> <li><i>• Auchan, retrieved on <a href="https://www.auchan.fr/">https://www.auchan.fr/</a></i></li> <li><i>• Carrefour, retrieved on <a href="https://www.carrefour.fr/">https://www.carrefour.fr/</a></i></li> <li><i>• Intermarché, retrieved on <a href="https://www.intermarche.com/">https://www.intermarche.com/</a></i></li> <li><i>• E.Leclerc, retrieved on <a href="https://www.e.leclerc/">https://www.e.leclerc/</a></i></li> </ul> <p><i>Germany:</i></p> <ul style="list-style-type: none"> <li><i>• Edeka, retrieved on <a href="https://www.edeka.de/">https://www.edeka.de/</a></i></li> <li><i>• Rewe, retrieved on <a href="https://www.rewe.de/">https://www.rewe.de/</a></i></li> <li><i>• Real, retrieved on <a href="https://www.real-markt.de/">https://www.real-markt.de/</a></i></li> <li><i>• Kaufland, retrieved on <a href="https://www.kaufland.de/">https://www.kaufland.de/</a></i></li> </ul> <p><i>Greece:</i></p> <ul style="list-style-type: none"> <li><i>• Alfa-Beta Vassilopoulos, retrieved on <a href="https://www.ab.gr/">https://www.ab.gr/</a></i></li> <li><i>• Sklavenitis, retrieved on <a href="https://www.sklavenitis.gr/">https://www.sklavenitis.gr/</a></i></li> </ul> |

- Masoutis, retrieved on <https://www.masoutis.gr/>
- My Market, retrieved on <https://www.mymarket.gr/el-GR/home>

*Italy:*

- Crai, retrieved on <https://www.craispesaonline.it/>
- Conad, retrieved on <https://www.conad.it/>
- Carrefour, retrieved on <https://www.carrefour.it/spesa-online/>
- Coop, retrieved on <https://www.e-coop.it/>

*Poland:*

- Auchan, retrieved on <https://www.auchan.pl/pl>
- Eurocash, retrieved on <https://eurocash.pl/>
- Carrefour, retrieved on <https://www.carrefour.pl/>
- Polski Koszyk, retrieved on <https://polskikoszyk.pl/>

*Portugal:*

- Continente, retrieved on <https://www.continente.pt/>
- Pingo Doce, retrieved on <https://www.pingodoce.pt/>
- Auchan, retrieved on <https://www.auchan.pt/>
- Spar, retrieved on <https://www.spar.pt/>

*Spain:*

- Alcampo, retrieved on <https://www.alcampo.es/compra-online/>
- Dia, retrieved on <https://www.dia.es/compra-online/>
- Carrefour, retrieved on <https://www.carrefour.es/>
- Mercadona, retrieved on <https://tienda.mercadona.es/>

*Argentina:*

- Coto, retrieved on <https://www.coto.com.ar/>
- Dia, retrieved on <https://diaonline.supermercadosdia.com.ar/>
- Walmart, retrieved on <https://www.walmart.com.ar/>
- Carrefour, retrieved on <https://www.carrefour.com.ar/>

*Brazil:*

- Pão de Açúcar, retrieved on <https://www.paodeacucar.com/>
- Extra, retrieved on <https://www.clubeextra.com.br/>
- Carrefour, retrieved on <https://www.carrefour.com.br/>
- Sonda, retrieved on <https://www.sondadelivery.com.br/>

*Paraguay:*

- Salemma, retrieved on <https://www.salemmaonline.com.py/>
- Gran Vía, retrieved on <https://granviaelid.com.py/>
- Superseis, retrieved on <https://www.superseis.com.py/default.aspx>
- Casa Rica, retrieved on <https://www.casarica.com.py/>

*Uruguay:*

- Disco, retrieved on <https://www.disco.com.uy/>
- Devoto, retrieved on <https://www.devoto.com.uy/>
- Géant, retrieved on <https://www.geant.com.uy/>
- Tienda Inglesa, retrieved on <https://www.tiendainglesa.com.uy/>

|                                  |                                                                                                                                                      |
|----------------------------------|------------------------------------------------------------------------------------------------------------------------------------------------------|
| <b>Data considerations</b>       | <i>The supermarkets on the tables were converted to numbers and do not necessarily correspond to the order disposed here due to ethical reasons.</i> |
| <b>Period of data collection</b> | <i>All data collected was done from January 2<sup>nd</sup> and February 28<sup>th</sup> of 2021.</i>                                                 |
